# Supplementary material for: Preparation and In Vitro Photodynamic Activity of Glucosylated Zinc(II) Phthalocyanines as Underlying Targeting Photosensitizers
Source: PubMed Central journal article supplement (PMC6154674; doi:10.3390/molecules22050845), 2017-05-19
Supplement: molecules-22-00845-s001.pdf [file molecules-22-00845-s001.pdf]

# Electronic Supporting Information

## Preparation and in Vitro Photodynamic Activity of Glucosylated Zinc(II) Phthalocyanines as Underlying Targeting Photosensitizers

Jian-Yong Liu <sup>1,\*</sup>, Chen Wang <sup>1</sup>, Chun-Hui Zhu <sup>1</sup>, Zhi-Hong Zhang <sup>2,\*</sup> and Jin-Ping Xue <sup>1</sup>

<sup>1</sup> State Key Laboratory of Photocatalysis on Energy and Environment & National & Local Joint Biomedical Engineering Research Center on Photodynamic Technologies, College of Chemistry, Fuzhou University, Fuzhou 350108, P. R. China

<sup>2</sup> Fuzhou General Hospital of Nanjing Military Command, Fuzhou 350005, P.R. China

### Table of Contents

|                   |                                          |
|-------------------|------------------------------------------|
| <b>Figure S1.</b> | <sup>1</sup> H NMR spectrum of <b>2</b>  |
| <b>Figure S2.</b> | <sup>13</sup> C NMR spectrum of <b>2</b> |
| <b>Figure S3.</b> | HRMS spectrum of <b>2</b>                |
| <b>Figure S4.</b> | <sup>1</sup> H NMR spectrum of <b>3</b>  |
| <b>Figure S5.</b> | HRMS spectrum of <b>3</b>                |
| <b>Figure S6.</b> | <sup>1</sup> H NMR spectrum of <b>6a</b> |
| <b>Figure S7.</b> | HRMS spectrum of <b>6a</b>               |
| <b>Figure S8.</b> | <sup>1</sup> H NMR spectrum of <b>6b</b> |
| <b>Figure S9.</b> | HRMS spectrum of <b>6b</b>               |
| <b>Figure S10</b> | <sup>1</sup> H NMR spectrum of <b>7a</b> |
| <b>Figure S11</b> | HRMS spectrum of <b>7a</b>               |
| <b>Figure S12</b> | <sup>1</sup> H NMR spectrum of <b>7b</b> |
| <b>Figure S13</b> | HRMS spectrum of <b>7b</b>               |

Residual solvent signals are marked with asterisks in all of the following spectra.

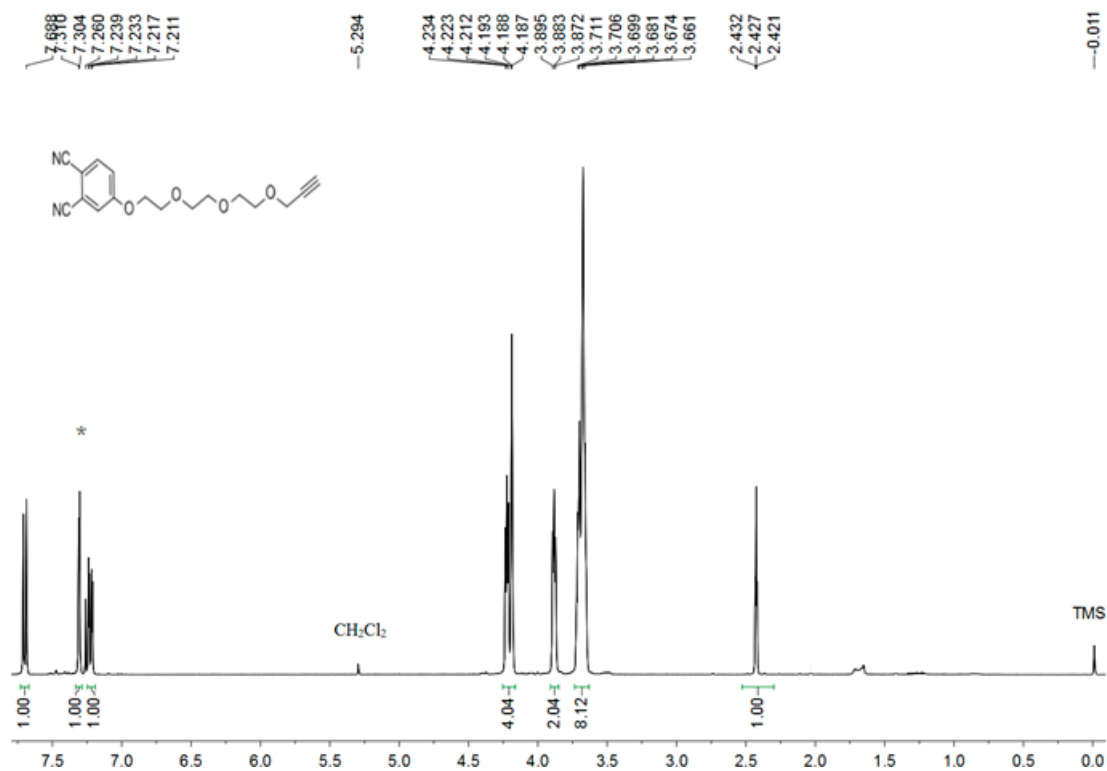

Figure S1.  $^1\text{H}$  NMR spectrum of compound 2 in  $\text{CDCl}_3$ .

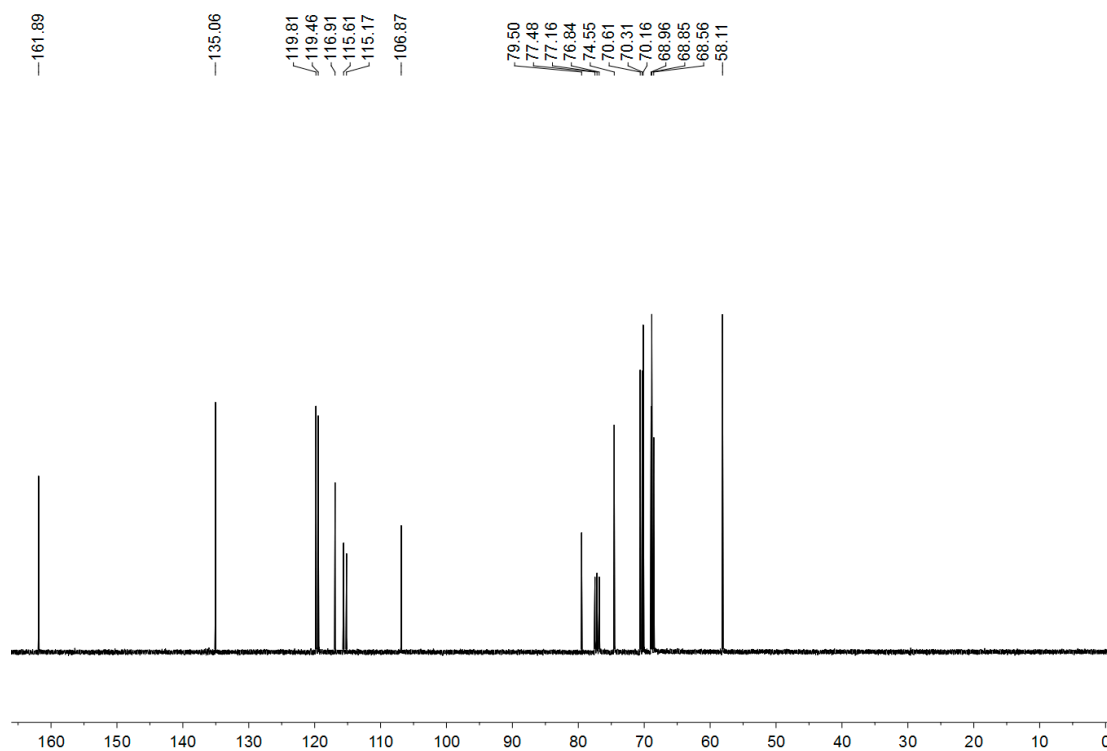

Figure S2.  $^{13}\text{C}$  NMR spectrum of compound 2 in  $\text{CDCl}_3$ .

ZCH-2\_140404113429 #847 RT: 1.97 AV: 1 NL: 3.12E8  
T: FTMS + p ESI Full ms [200.00-500.00]

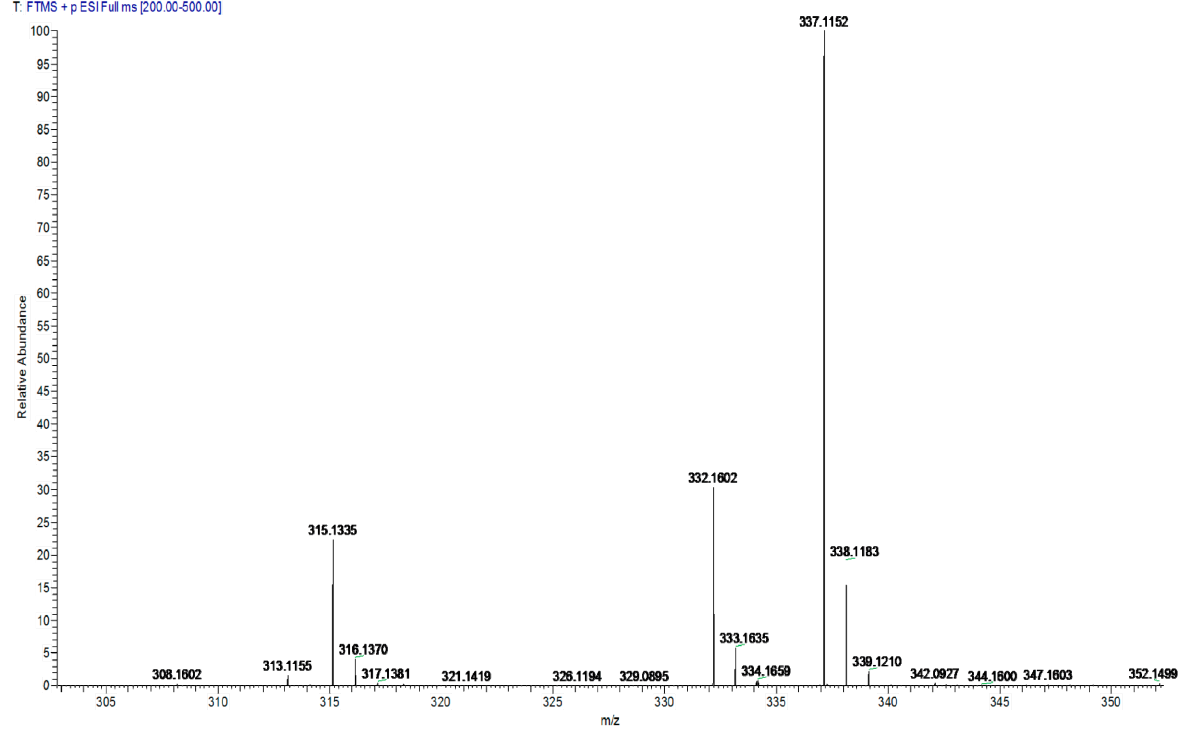

Figure S3. HRMS spectrum of compound 2.





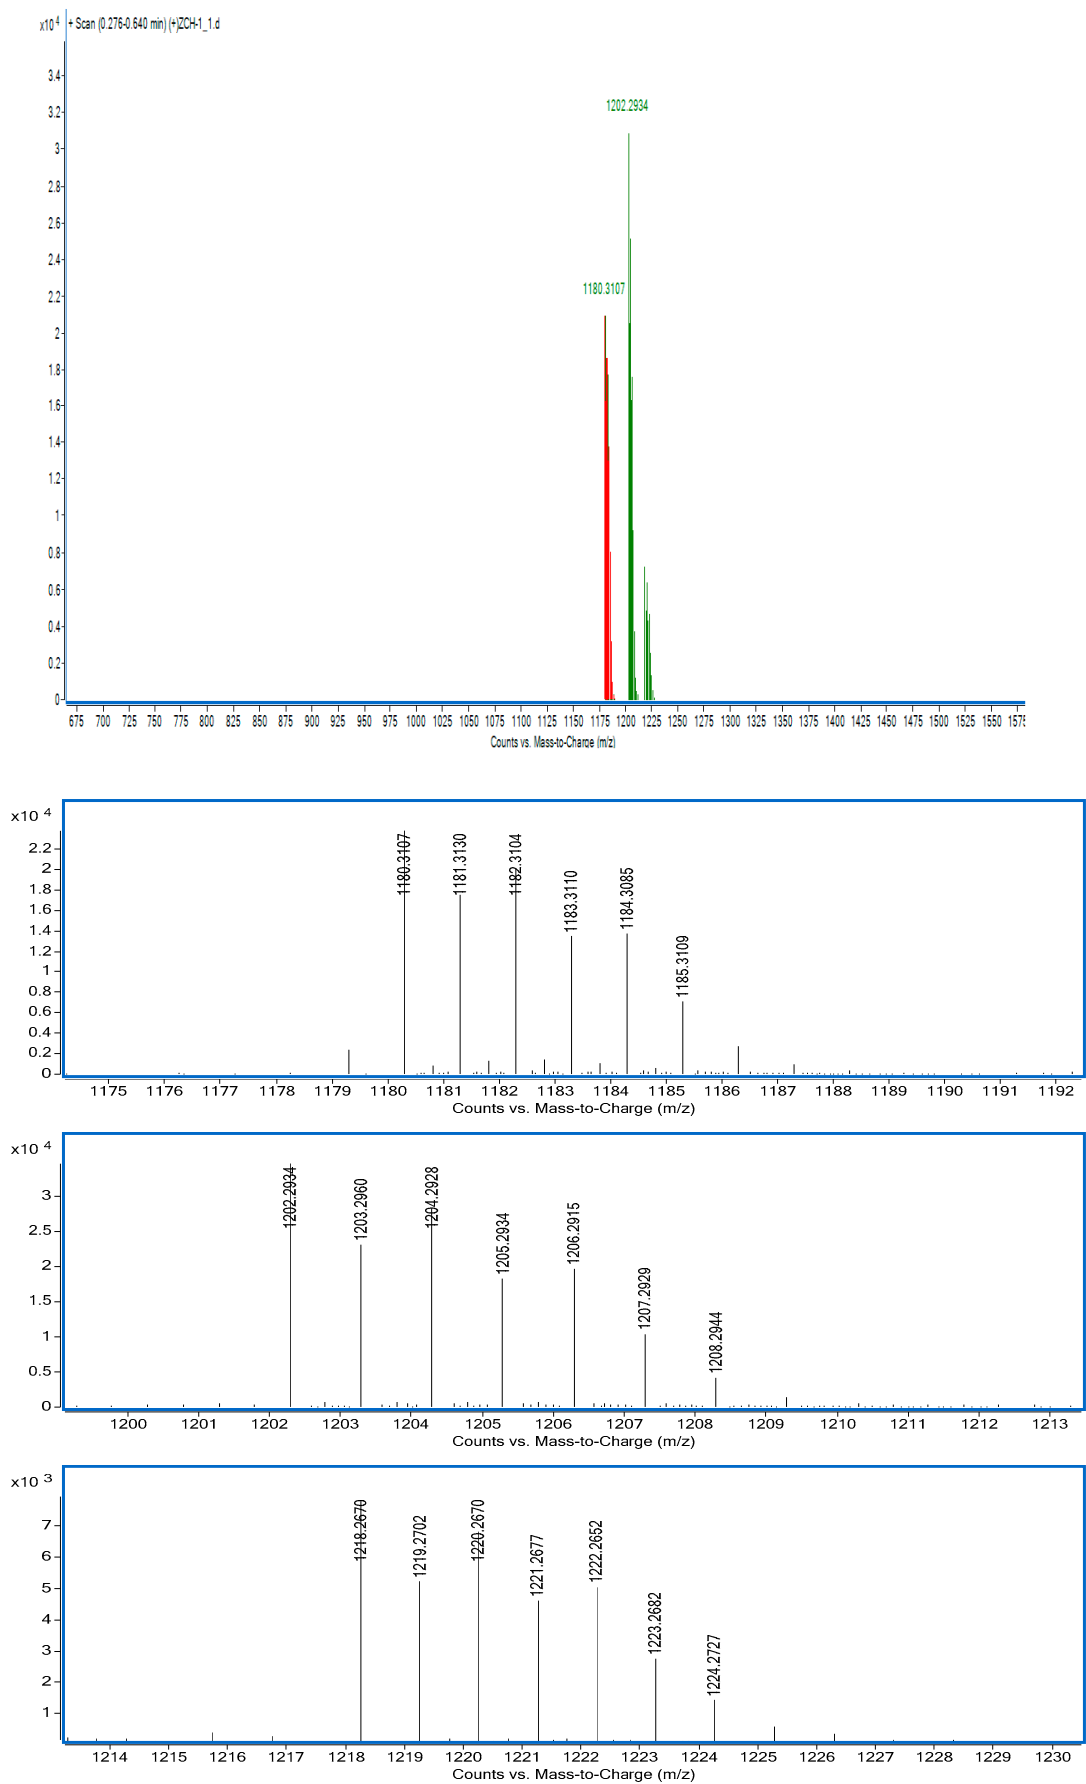

Figure S7. HRMS spectrum of compound 6a.

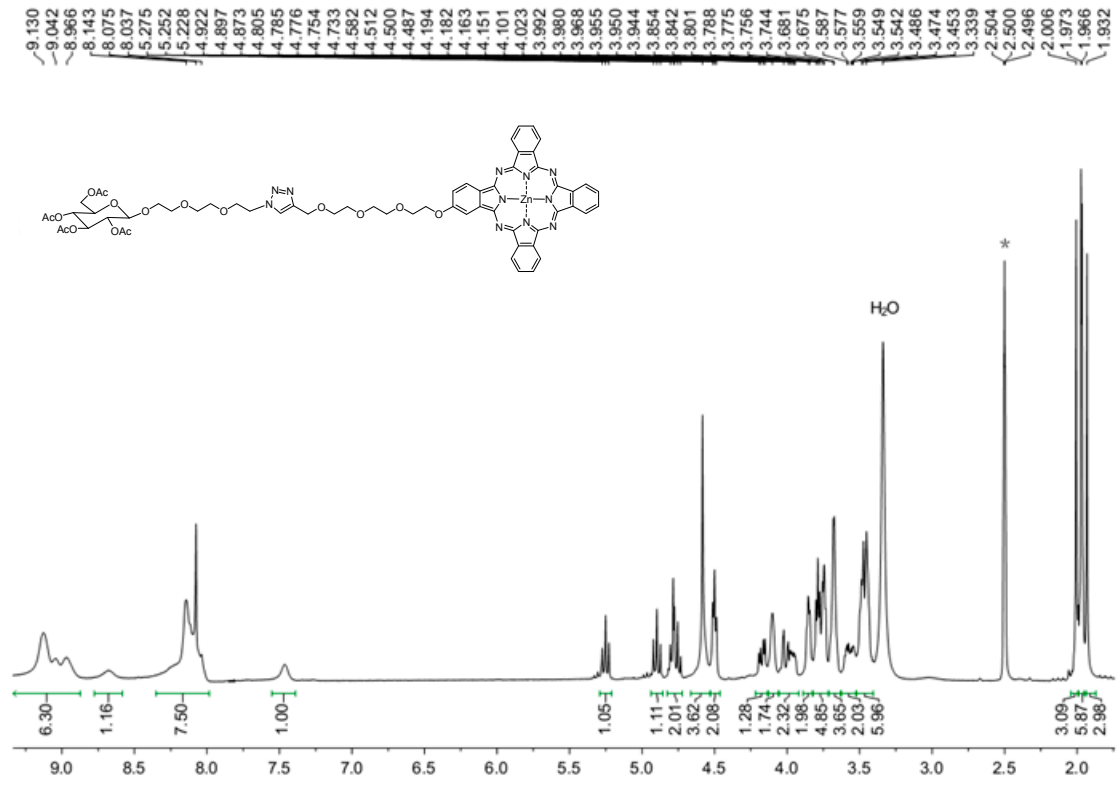

Figure S8. <sup>1</sup>H NMR spectrum of compound **6b** in DMSO-d<sub>6</sub>.

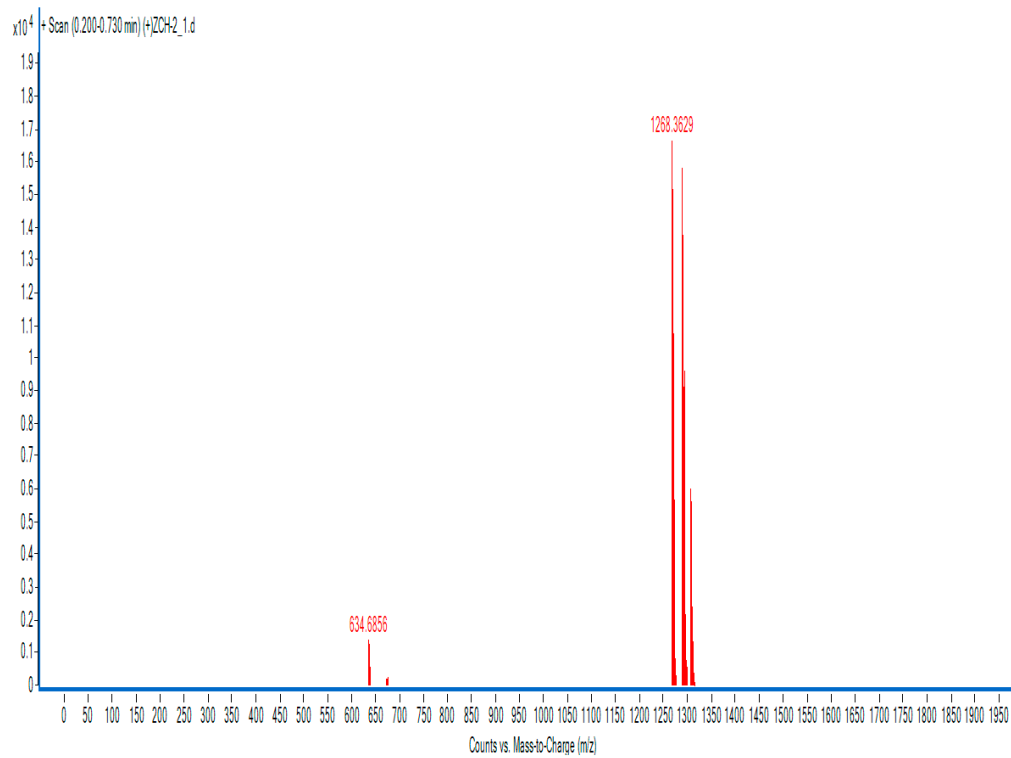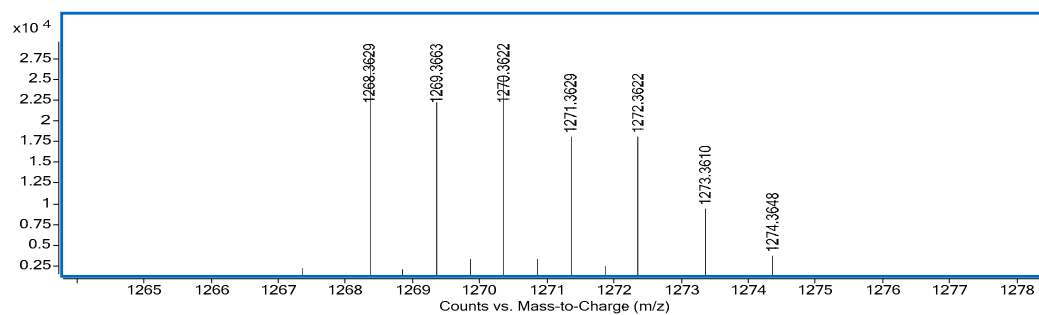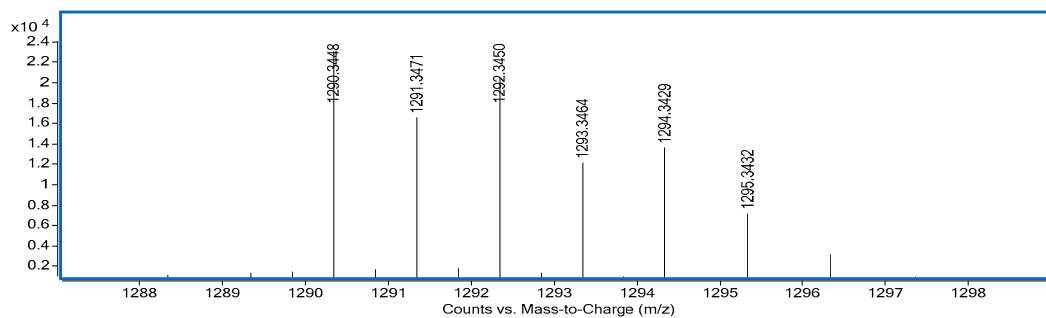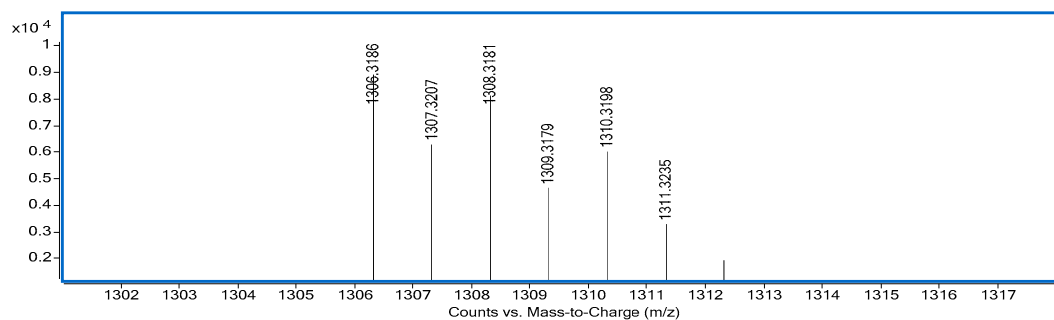

Figure S9. HRMS spectrum of compound **6b**.



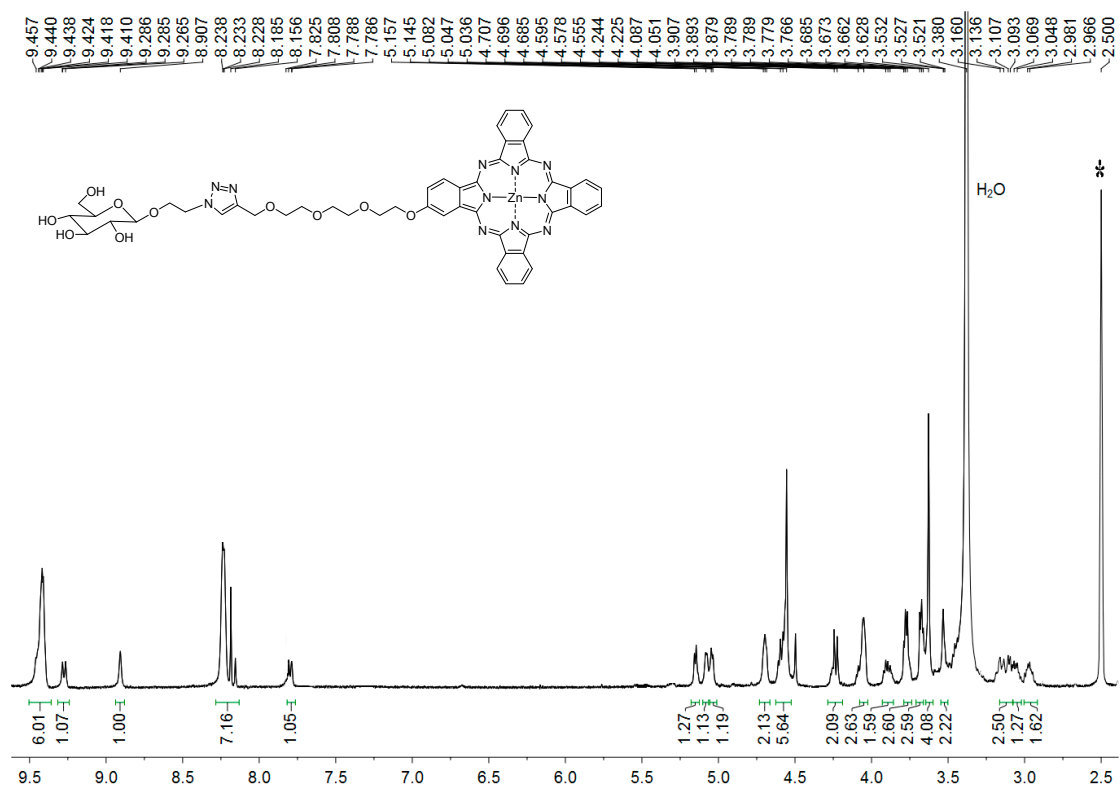

Figure S10. <sup>1</sup>H NMR spectrum of compound 7a in DMSO-d<sub>6</sub>.

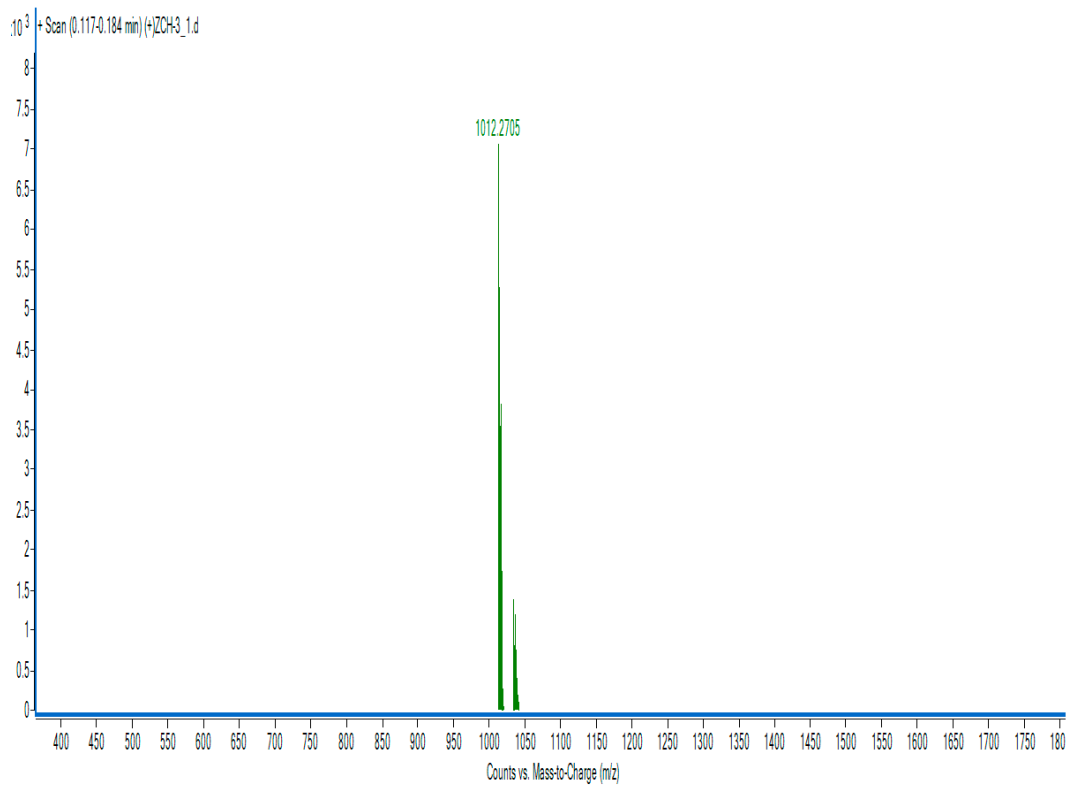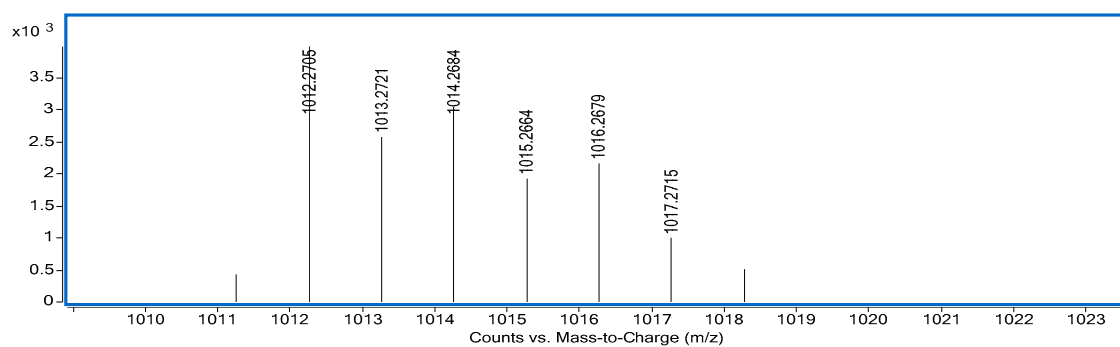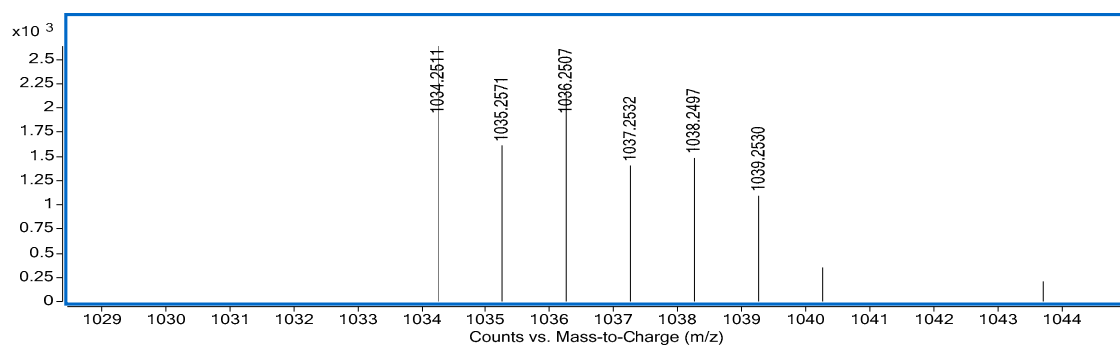

Figure S11. HRMS spectrum of compound 7a.

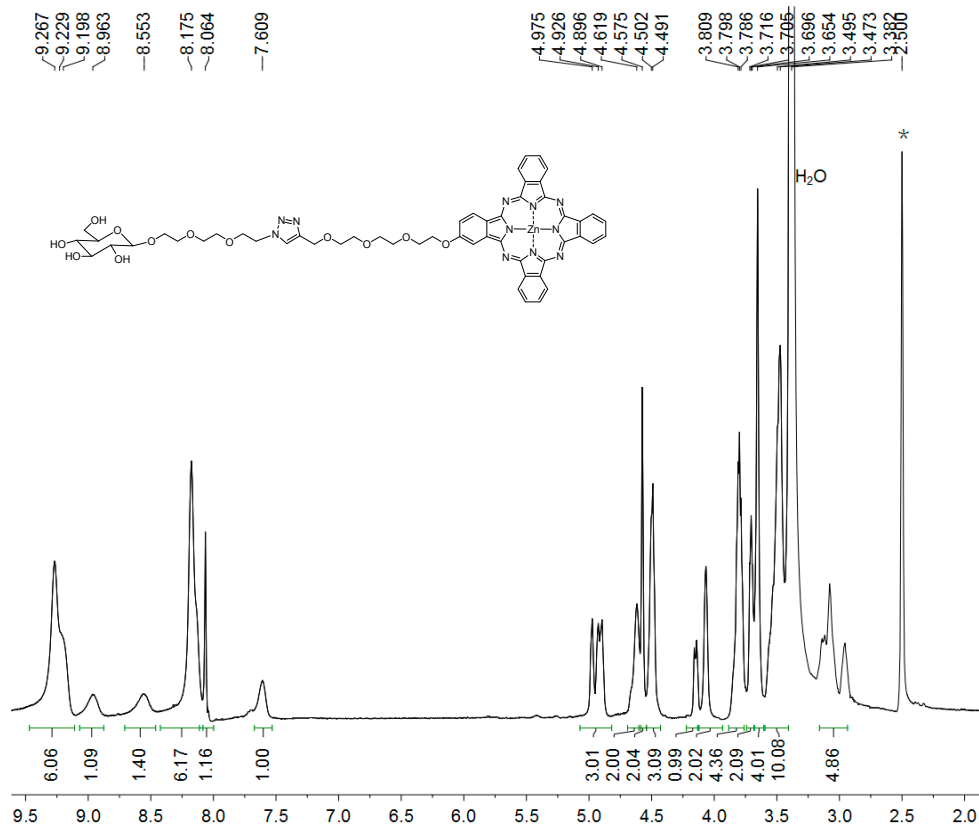

**Figure S12.**  $^1\text{H}$  NMR spectrum of compound **7b** in  $\text{DMSO-d}_6$ .

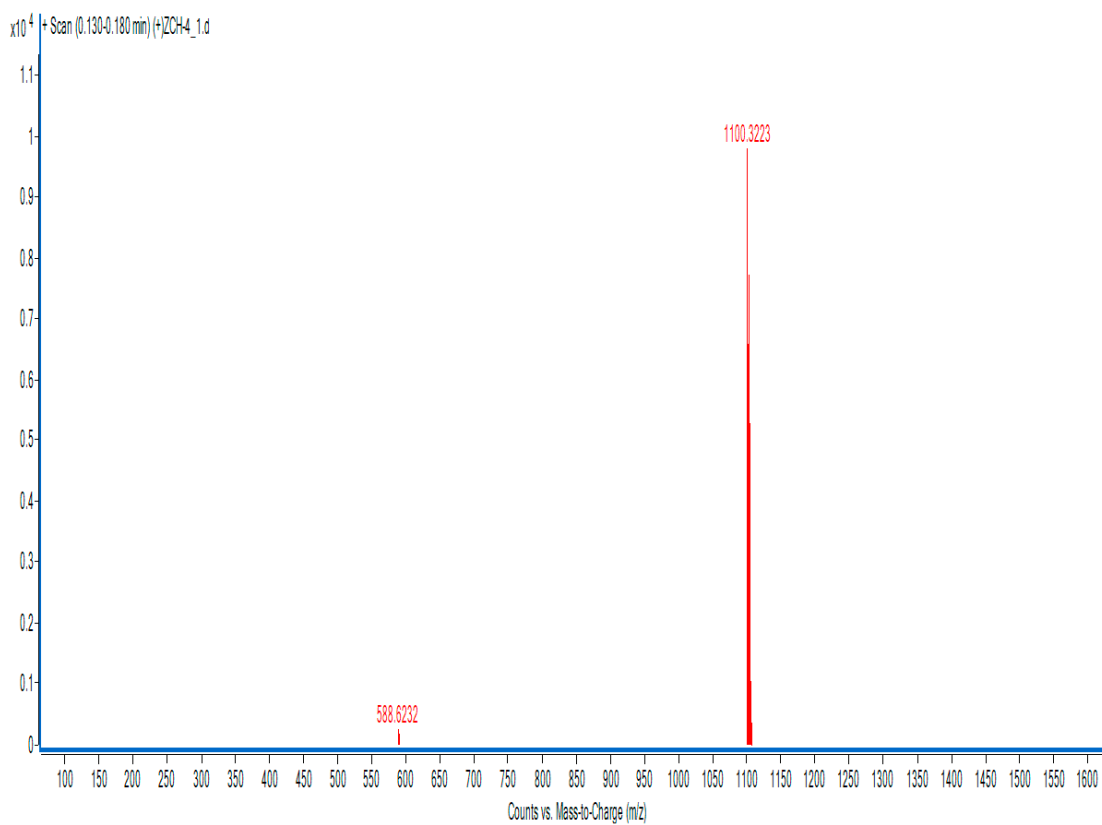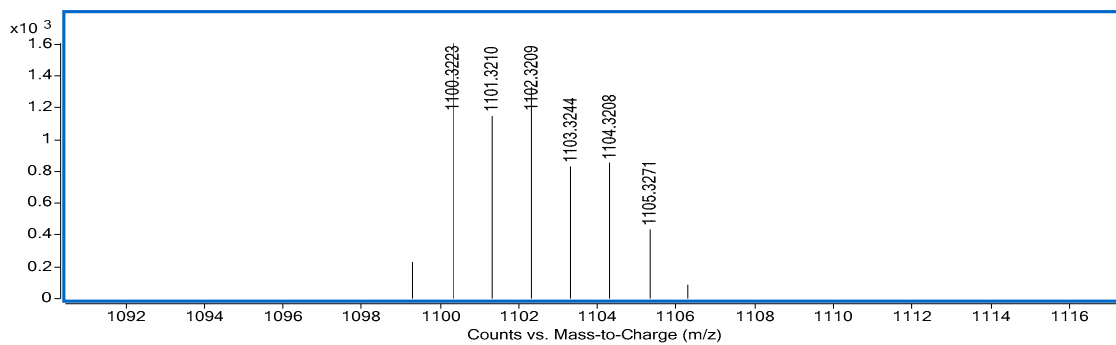

**Figure S13.** HRMS spectrum of compound **7b**.
